# Supplementary material for: Nitric Oxide and Globin Glb1 Regulate Fusarium oxysporum Infection of Arabidopsis thaliana
Source: MDPI journal article supplement (doi:10.3390/antiox12071321), 2023-06-21
Supplement: s1 [file s1]

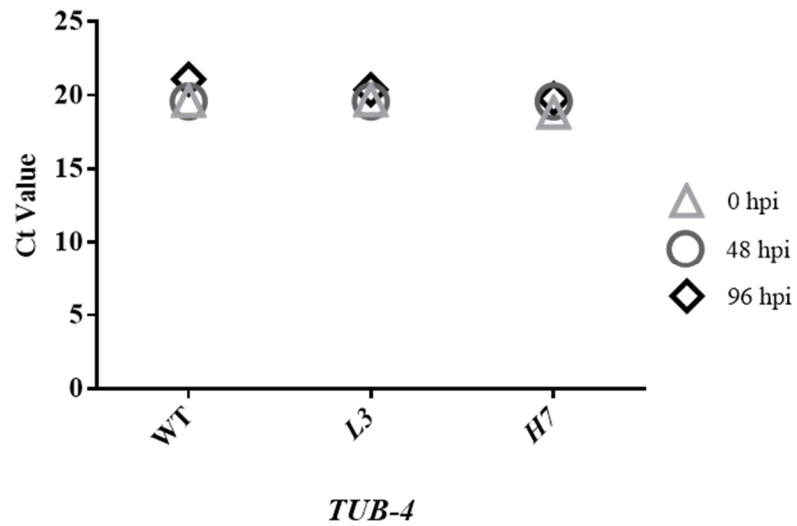

**Supplemental Figure S1. *TUB4* expression stability under our experimental conditions.** Mean of RT-qPCR Ct values of the selected candidate as a reference gene (*TUB4*) in WT, L3 and H7 Arabidopsis seedlings under control treatment (0 hpi) and *F. oxysporum* infection (48 and 96 hpi).

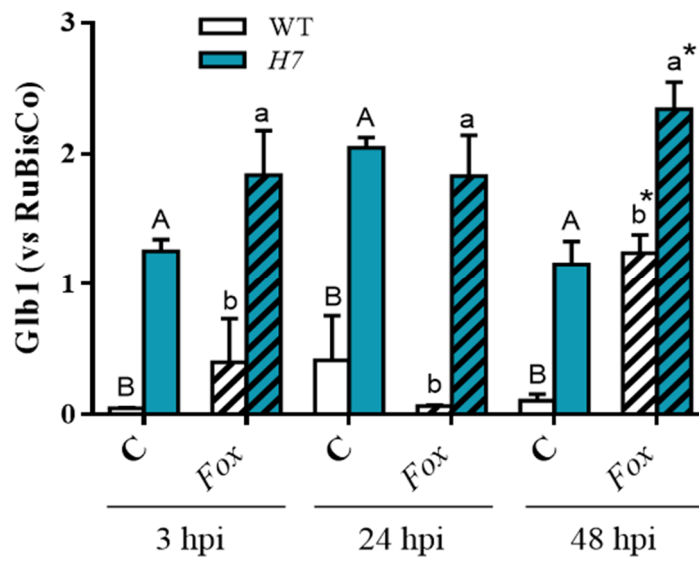

**Supplemental Figure S2. GLB1 content in Arabidopsis roots in response to *F. oxysporum*.** Western-blot quantification of GLB1 in WT and *H7* Arabidopsis roots at 3, 24 and 48 hpi infected or not (C) with *F. oxysporum* relatively expressed vs Ponceau bands. Data represent the mean  $\pm$  SEM of at least 2 independent experiments. Different letters denote significant differences between genotypes (capital letters in control conditions and lowercase under infection conditions) according to Tukey's multiple comparison test ( $P < 0.05$ ). Asterisks denote significant differences respect to control within each genotype, in each time point according to T-Student test ( $P < 0.05$ ).

(A)

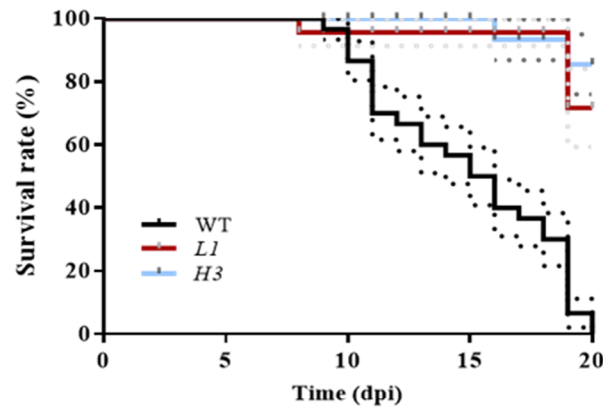

(B)

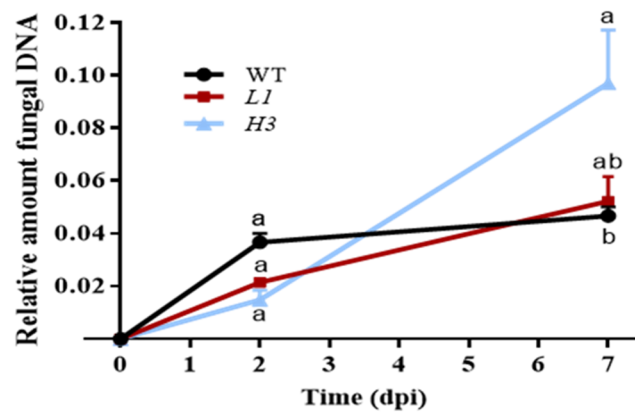

**Supplemental Figure S3. Disease development after *F. oxysporum* inoculation of *Glb1* mutants: *L1* and *H3*.** (A) Kaplan-Meier plot of the WT, *L1* and *H3* Arabidopsis seedlings survival infected with *F. oxysporum* over the course of 20 dpi. (B) Fungal burden at 0, 2 and 7 dpi determined by RT-qPCR analysis of the *F. oxysporum Actin* gene relative to the Arabidopsis *TUB4* gene. Data represent the mean  $\pm$  SEM of at least 3 independent experiments. There's no significant differences in (B) between genotypes in none of the time points according to Tukey's multiple comparison test ( $P < 0.05$ ). Asterisks in (B) denote significant differences respect to control (0 hpi) according to Dunnett's multiple comparison test ( $P < 0.05$ ).

(A)

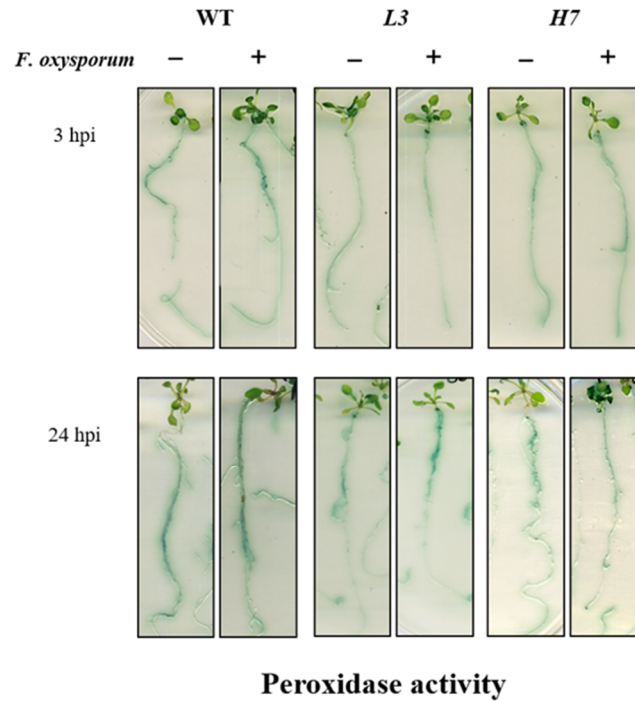

(B)

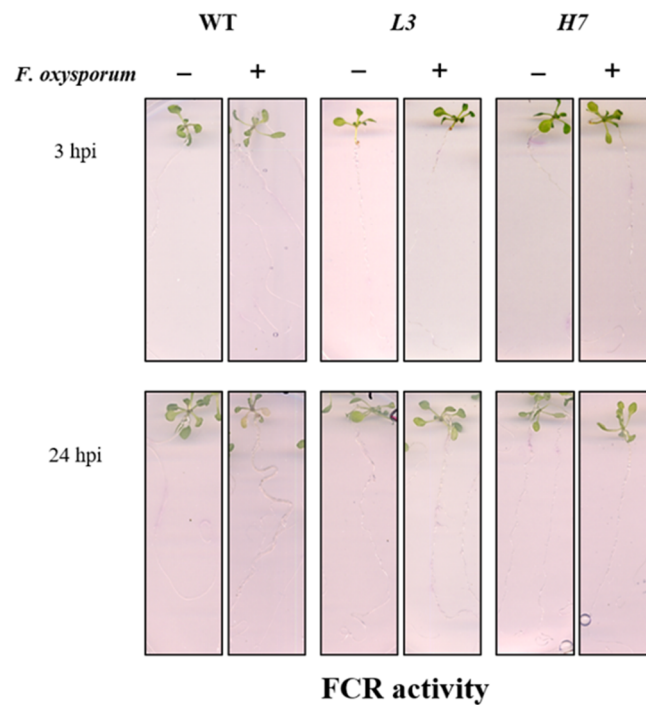

**Supplemental Figure S4. Peroxidase and ferric chelate reductase (FCR) activity in *Arabidopsis* roots after *F. oxysporum* infection.** Representative images showing peroxidase (A) or ferric chelate reductase (FCR; B) activity in WT, *L3* and *H7* *Arabidopsis* seedling roots before (-) and after (+) *F. oxysporum* inoculation (3 and 24 hpi). Images are representative of at least three independent experiments.

**Supplemental Table S1.** Oligonucleotides used for RT-qPCR

| Gene                | Primer sequence            | ID         | T° | Amp | Eff. | References                     |
|---------------------|----------------------------|------------|----|-----|------|--------------------------------|
| <i>PDF 1.2-s</i>    | AGTTGTGCGAGAAGCCAAGT       | AT5G44420  | 60 | 107 | 1.98 | (Fernández-Calvo et al., 2011) |
| <i>PDF 1.2-as</i>   | GTTGCATGATCCATGTTTGG       |            |    |     |      |                                |
| <i>PR1-s</i>        | TCCGCCGTGAACATGTGGGTTAG    | AT2G14610  | 55 | 180 | 2.01 | Beacon desing                  |
| <i>PR1-as</i>       | CCCACGAGGATCATAGTTGCAACTGA |            |    |     |      |                                |
| <i>PR5-s</i>        | CGGTACAAGTGAAGGTGCTCGTT    | AT1G75040  | 55 | 312 | 1.94 | Beacon desing                  |
| <i>PR5-as</i>       | GCCTCGTAGATGGTTACAATGTCA   |            |    |     |      |                                |
| <i>FIT-s</i>        | ATCCTTCATACGCCCTCTCC       | AT2G28160  | 60 | 149 | 1.99 | Beacon desing                  |
| <i>FIT-as</i>       | GAGCCGGTGGTGAAGAAG         |            |    |     |      |                                |
| <i>IRT1-s</i>       | CGGTTGGA CTCTAAATGC        | AT4G19690  | 55 | 165 | 1.97 | (Besson-Bard et al., 2009)     |
| <i>IRT1-as</i>      | CGATAATCGACATTCCACCG       |            |    |     |      |                                |
| <i>Foxc act1-as</i> | ATGTCACCACCTTCAACTCCA      | FOXG_04579 | 55 | 300 | 2    | (Masachis et al., 2016)        |
| <i>Foxc act1-s</i>  | CTCTCGTCGTA CTCTGCTT       |            |    |     |      |                                |

**Supplemental Table S2.** Reverse transcription quantitative PCR parameters according to the Minimum Information for publication of Quantitative real-time PCR Experiments (MIQE) guidelines derived from Bustin et al., 2009 [48].

| <b>Sample/Template</b>               |                                                                                                                                                                                          |
|--------------------------------------|------------------------------------------------------------------------------------------------------------------------------------------------------------------------------------------|
| Source                               | <i>Arabidopsis thaliana</i> seedling.                                                                                                                                                    |
| Method of preservation               | Harvest in liquid nitrogen, storage at -80 °C.                                                                                                                                           |
| Storage time (if appropriate)        | Maximum one week.                                                                                                                                                                        |
| Handling                             | Frozen.                                                                                                                                                                                  |
| Extraction method                    | Trizol reagent (Invitrogen).                                                                                                                                                             |
| RNA: DNA-free                        | DNA-free™ DNA Removal Kit (Ambion DNA free).<br>Use of intron-spanning primers.<br>Verification of single peak on dissociation curves (Melting curve).                                   |
| RNA: concentration                   | NanoDrop® ND-1000 spectrophotometer/ and agarose (1%) electrophoresis gel.                                                                                                               |
| RNA: integrity                       | NanoDrop® ND-1000 spectrophotometer and agarose (1%) electrophoresis gel.                                                                                                                |
| <b>Assay optimisation/validation</b> |                                                                                                                                                                                          |
| Accession number                     | References cited in Materials and methods.                                                                                                                                               |
| Amplicon details                     | References cited in Materials and methods.                                                                                                                                               |
| Primer sequence                      | References cited in Materials and methods.                                                                                                                                               |
| <i>In silico</i>                     | Primer-BLAST ( <a href="http://www.arabidopsis.org/Blast/index.jsp">http://www.arabidopsis.org/Blast/index.jsp</a> ).                                                                    |
| Empirical                            | Primer concentrations of 250 nM.<br>Annealing temperature of 55 or 60 °C.                                                                                                                |
| Priming conditions                   | Combination of oligo-dT primers and random hexamers.                                                                                                                                     |
| PCR efficiency                       | Dilution curves (slope, deviation).                                                                                                                                                      |
| Linear dynamic range                 | Samples are within the range of the efficiency curve.                                                                                                                                    |
| <b>RT and qPCR</b>                   |                                                                                                                                                                                          |
| Protocols                            | iCycler iQ Real-Time PCR Detection System (Bio-Rad).<br>PrimerScript RT reagent Kit (Takara).<br>SYBR Premix Ex Taq™ II (Takara) .<br>As described in the Materials and methods section. |
| Reagents                             | As described in the materials and methods section.                                                                                                                                       |
| NTC                                  | Cq and dissociation curve verification.                                                                                                                                                  |
| <b>Data analysis</b>                 |                                                                                                                                                                                          |
| Specialist software                  | e iCycler Program (Bio Rad).                                                                                                                                                             |
| Statistical justification            | As described in the Materials and methods section.                                                                                                                                       |
| Transparent, validated normalisation | Minimum five references genes selected using the GrayNorm algorithm.<br>As described in the Materials and methods section.                                                               |
